# Supplementary material for: Double-Stranded RNA Structural Elements Holding the Key to Translational Regulation in Cancer: The Case of Editing in RNA-Binding Motif Protein 8A
Source: MDPI journal article supplement (doi:10.3390/cells10123543), 2021-12-15
Supplement: s1 [file s1]

A

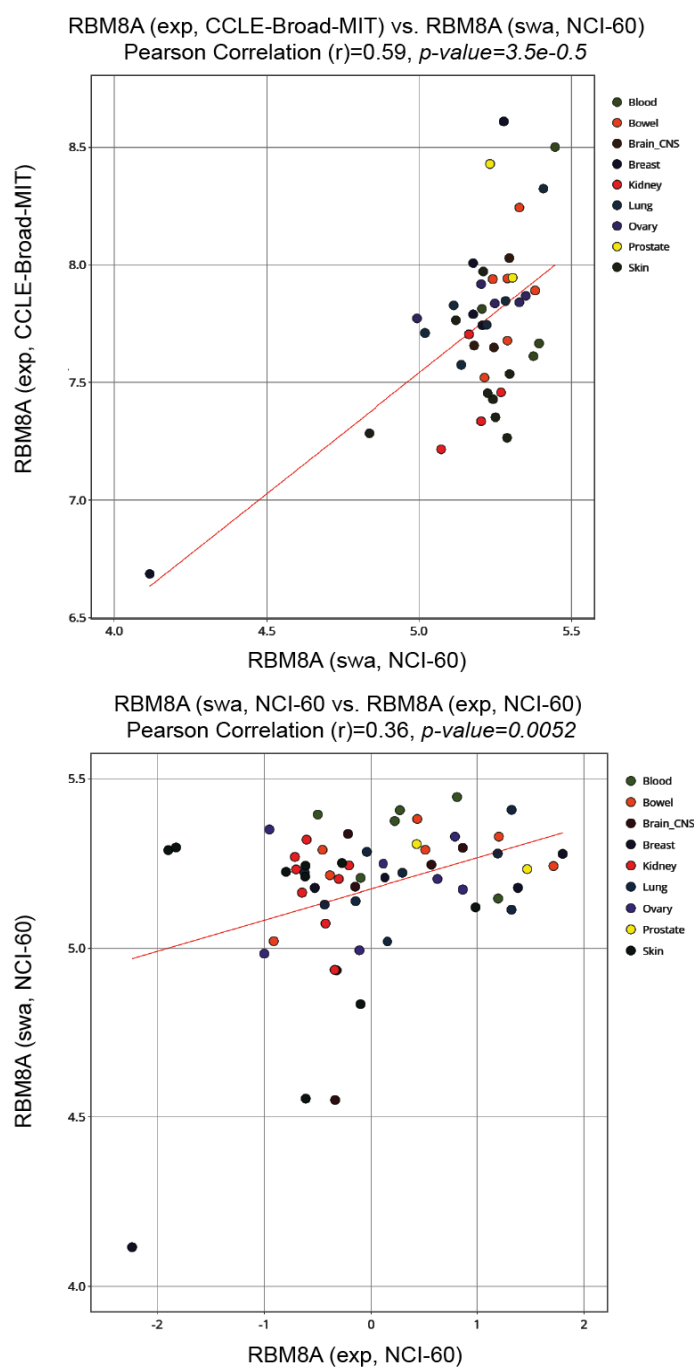

B

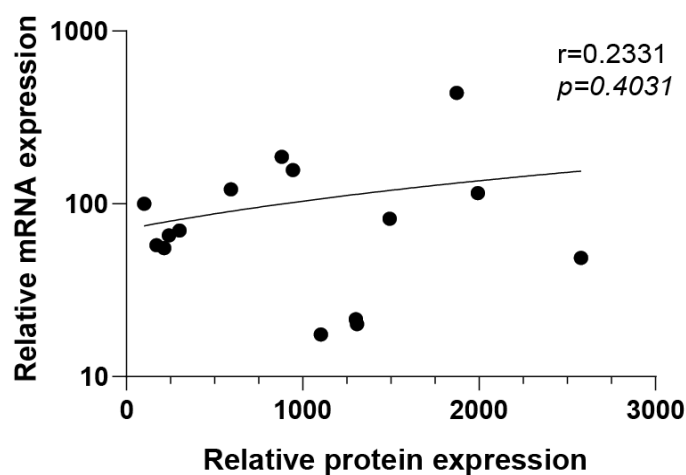

**Figure S1.** Correlation of RBM8A protein and RNA expression in different human cell lines. **(A).** Data were obtained using CellMinerCDB (<https://discover.nci.nih.gov/rsconnect/cellminerfdb/>, accessed on 28 April 2020). Upper graph: RBM8A protein expression (NCI-60 dataset) on x-axis and mRNA expression (CCLE-Broad-MIT dataset) on y-axis. Lower graph: RNA expression on x-Axis (NCI-60 dataset) and protein expression on y-axis (NCI-60 dataset). **(B)** Correlation of RBM8A protein and RNA expression in mesothelioma cell lines.

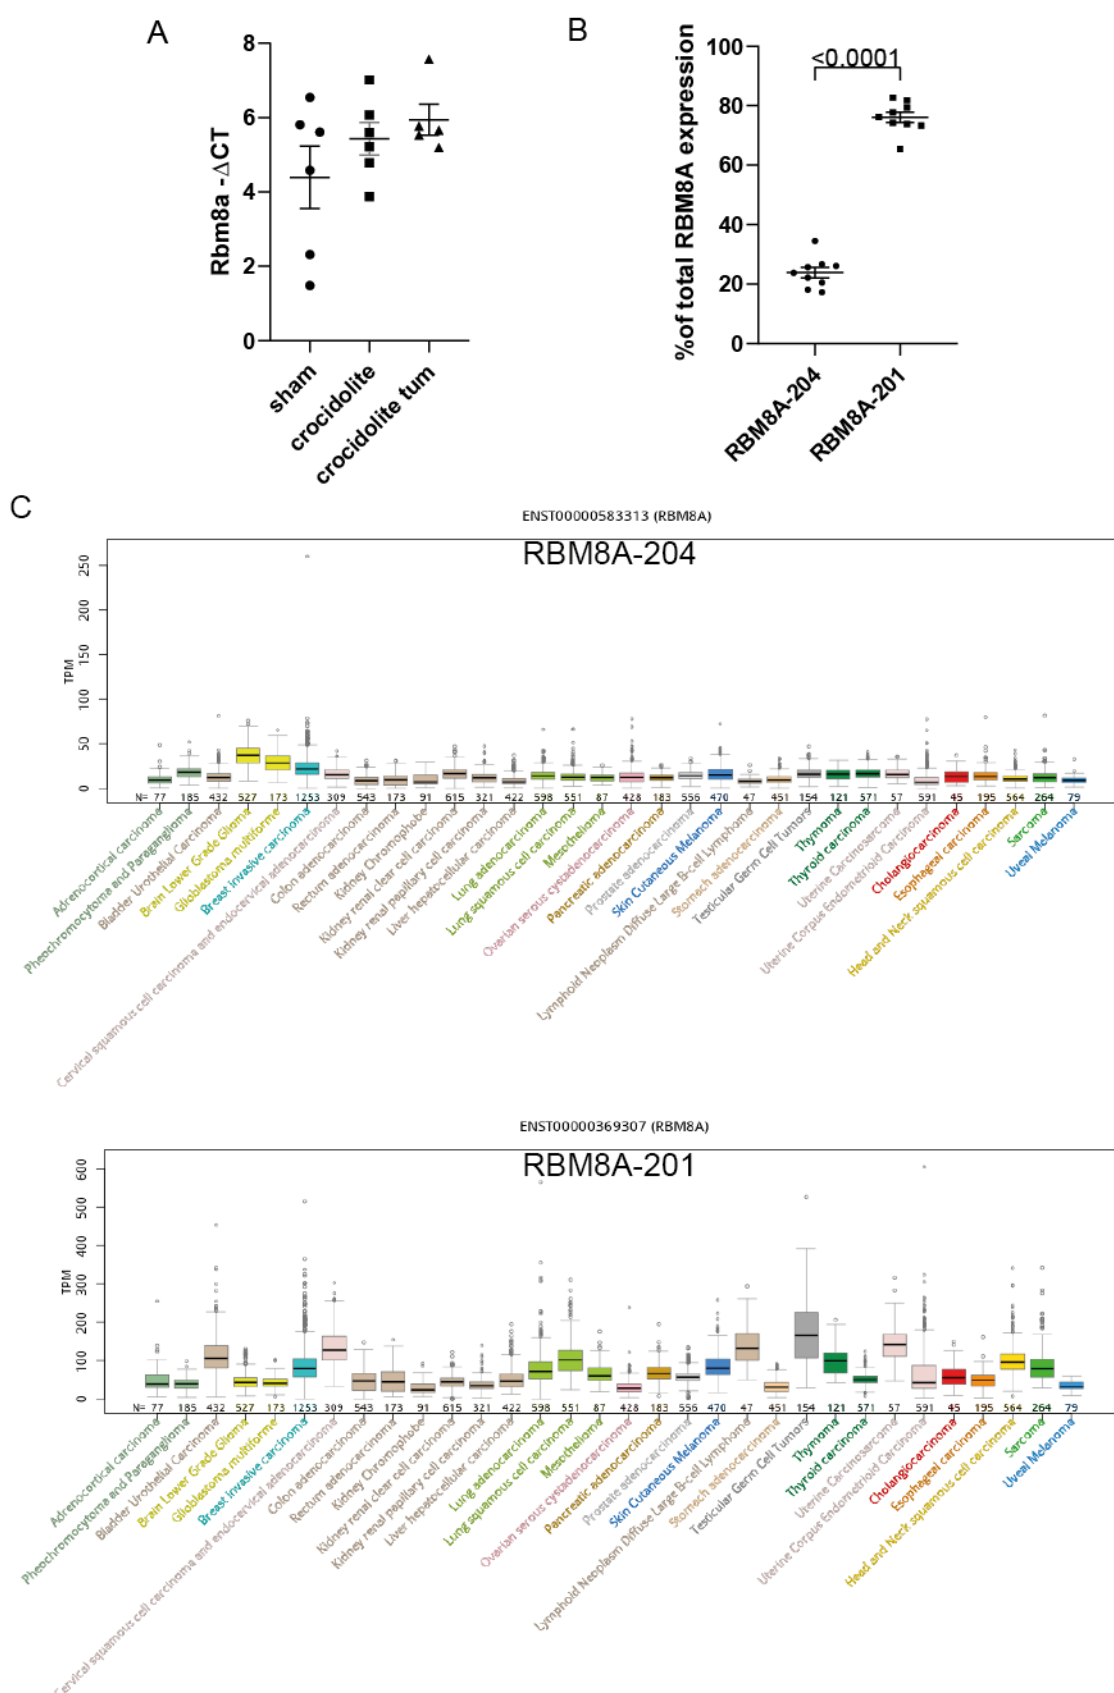

**Figure S2.** *Rbm8a* mRNA expression in crocidolite (blue asbestos) exposed mice and abundance of *RBM8A* transcripts in mesothelial cells or various cancers. (A). *Rbm8a* expression levels do not vary significantly upon crocidolite exposure. (B)

*RBM8A-204* levels are significantly lower compared to *RBM8A-201* levels in mesothelial cells. C. Expression profile of *RBM8A-204* (upper panel) and *RBM8A-201* (lower panel) in different cancer types. TPM=Transcripts per Million.

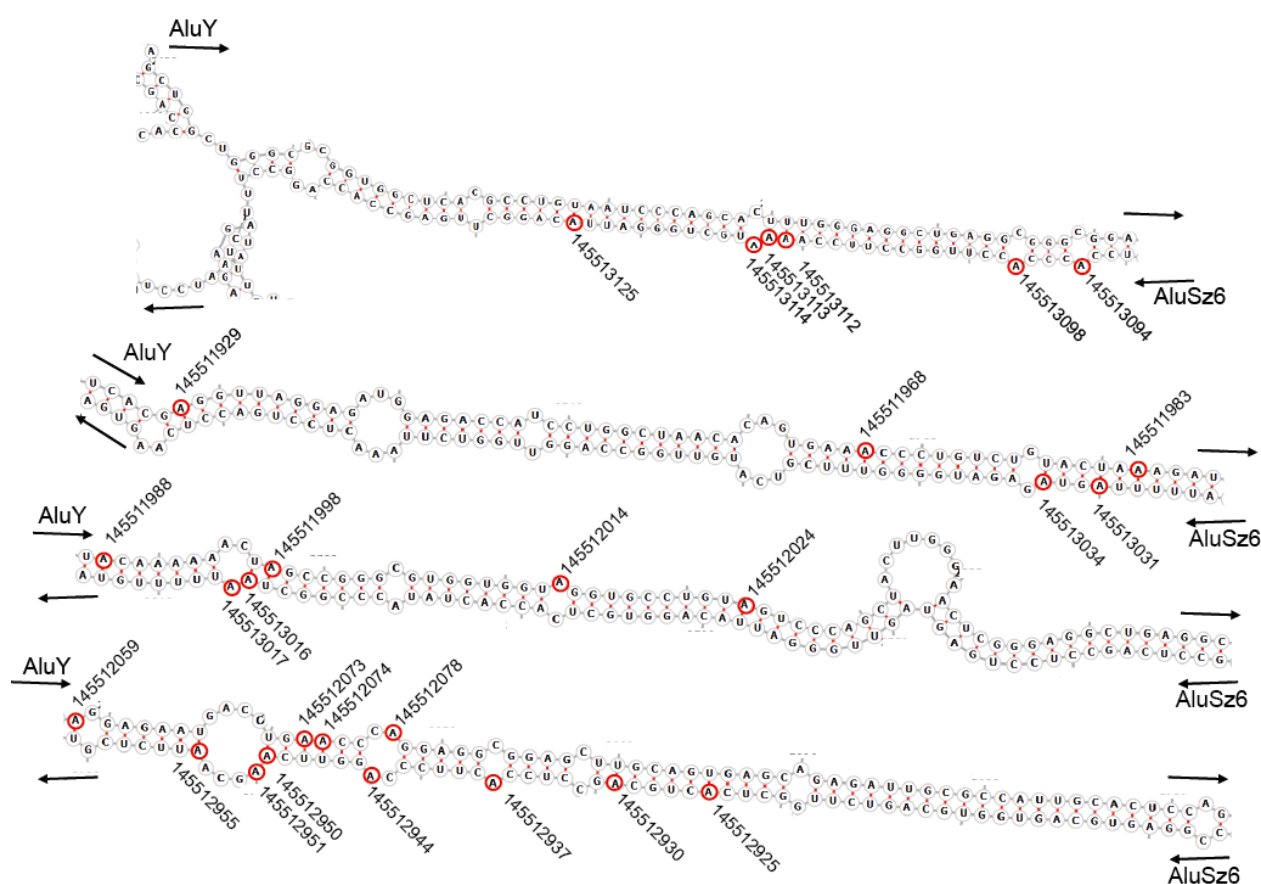

**Figure S3.** dsRNA stretch of *RBM8A* 3'UTR formed by *AluY* and *AluSz6* elements. Red circles indicate A-I editing sites and the number refers to nucleotide positions on chromosome 1, hg19. Structure is predicted by RNAfold webserver (<http://rna.tbi.univie.ac.at/cgi-bin/RNAWebSuite/RNAfold.cgi>, accessed on 27 April 2021).

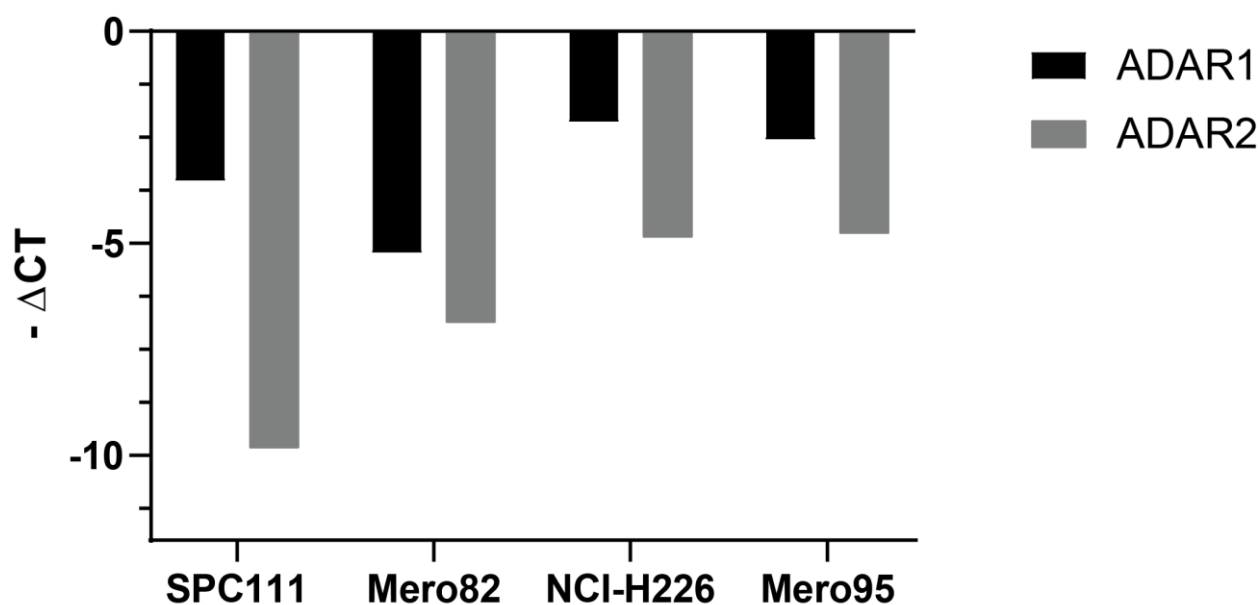

**Figure S4.** *ADAR1/2* mRNA heterogeneous expression in four MPM cell lines. *ADAR1* (black) and *ADAR2* (gray) mRNA levels in SPC111, Mero82, NCI-H226 and Mero95 MPM cell lines.

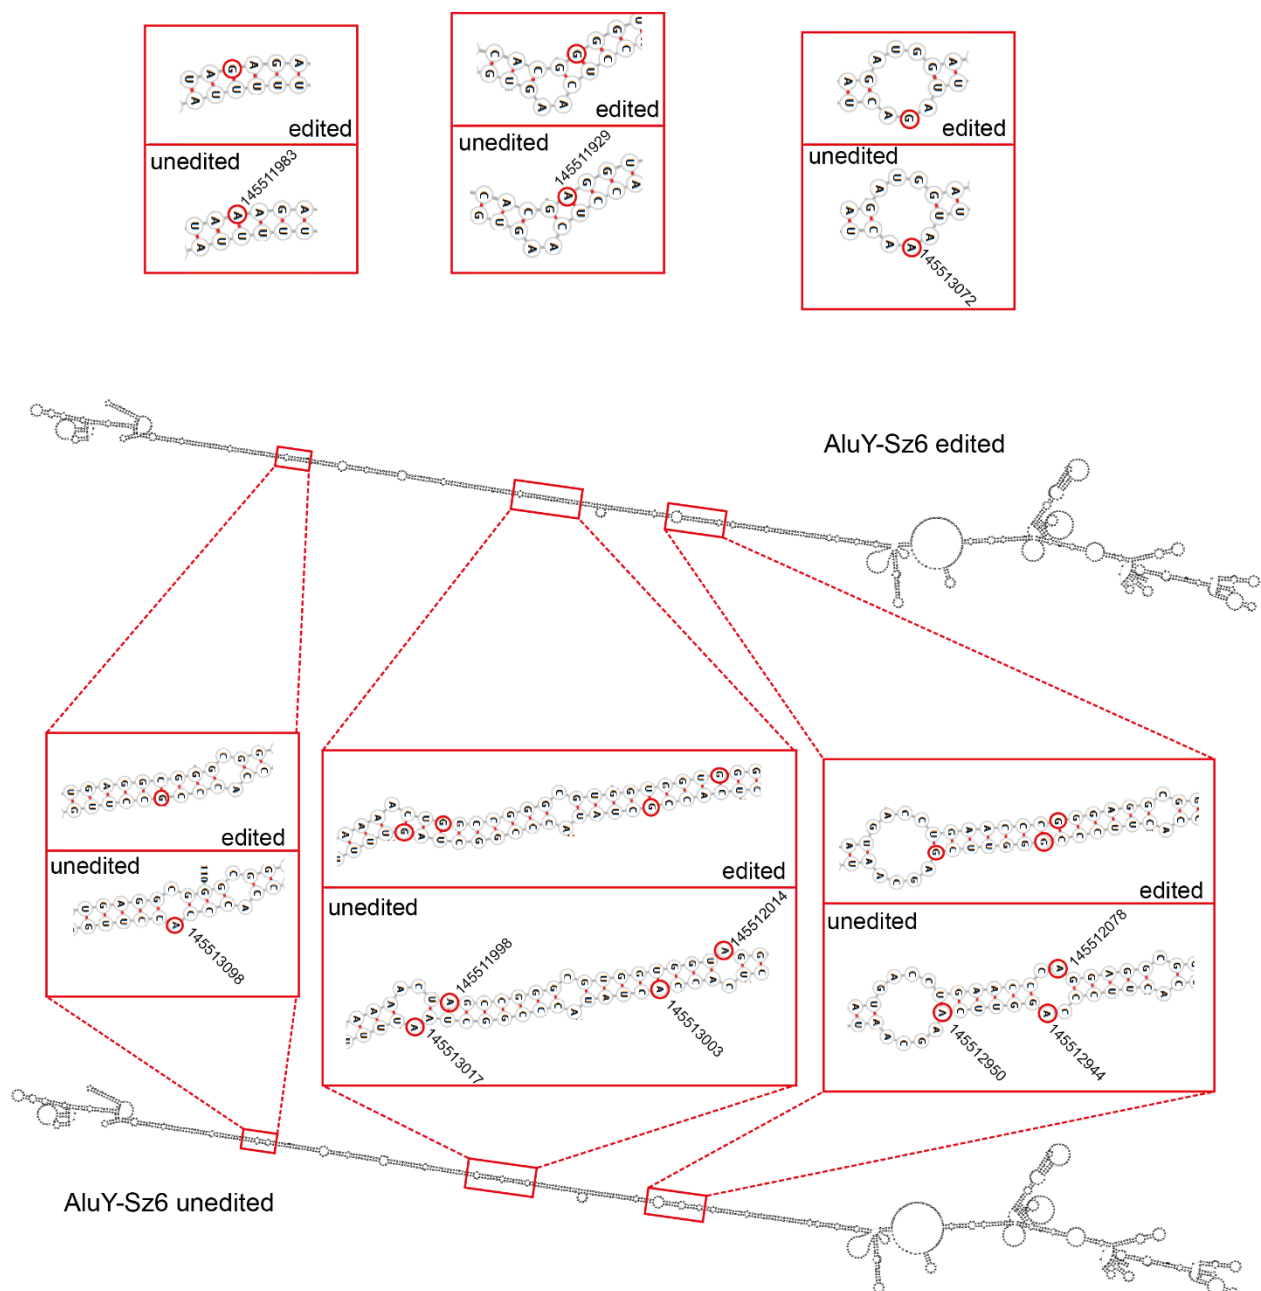

**Figure S5.** Editing of *RBM8A* 3'UTR AluY-AluSz6 entails structural changes. Red squares in lower part magnify sections with structure change upon editing. Red circles indicate editing sites and numbers of the nucleotide position in chromosome 1, hg19. In the upper part are shown some edited sites leading to no structural change. Structures are predicted by RNAfold webserver (<http://rna.tbi.univie.ac.at/cgi-bin/RNAWebSuite/RNAfold.cgi>, accessed on 27 April 2021).

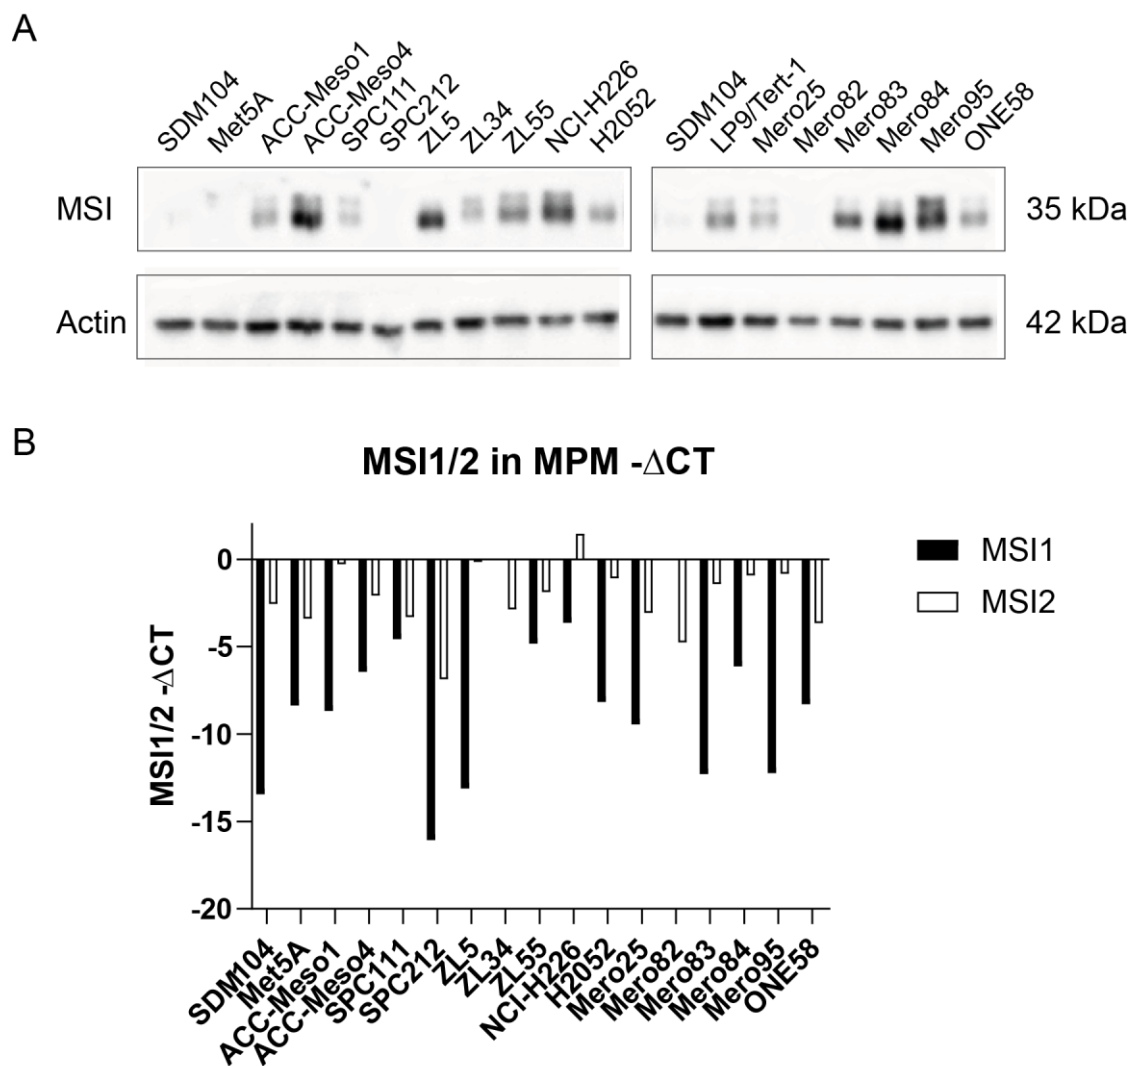

**Figure S6.** MSI2 expression is higher compared to MSI1 in MPM. (A). Western Blot analysis of MSI protein expression in 16 MPM cell lines and mesothelial cells. Actin is used as loading control. (B) Relative mRNA levels for *MSI1* (black) and *MSI2* (white).

|           |                                                                |     |
|-----------|----------------------------------------------------------------|-----|
| Gibbon    | ggctggg'gcggtggctcaagcctgtaatcccagcactttgggagggtagggcgggcgga   | 60  |
| Orangutan | ggctggg'gcggtggctcacgcctgtaatcccagcactttgggagggtagggcgggtgga   | 60  |
| Bonobo    | ggctggg'gcggtggctcacgcctgtaatcccagcactttgggagggtagggcgggcgga   | 60  |
| Human     | ggctggg'gcggtggctcacgcctgtaatcccagcactttgggagggtagggcgggcgga   | 60  |
|           | *****                                                          |     |
| Gibbon    | tcacgaggtcaggagatcgagaccatcccggctaacacagtgaaccccgctctgtactaa   | 120 |
| Orangutan | tcacgaggtcaggagatggagaccatcctggctaacacagtgaaccccatctgtactaa    | 120 |
| Bonobo    | tcacgaggttaggagatggagaccatcctggctaacacagtgaacccctgtctgtactaa   | 120 |
| Human     | tcacgaggttaggagatggagaccatcctggctaacacagtgaacccctgtctgtactaa   | 120 |
|           | *****                                                          |     |
| Gibbon    | agatagaaaaaattagctgggcgtggtggcgggcgccctgtagtcccagctactggggaac  | 180 |
| Orangutan | agatacaaaaaactagccgggcgtagtgccggggcacctgtagtcccagctactcggggaac | 180 |
| Bonobo    | agatacaaaaaactagccgggcgtggtggttaggtgcctgtagtcccagctacttggggaac | 180 |
| Human     | agatacaaaaaactagccgggcgtggtggttaggtgcctgtagtcccagctacttggggaac | 180 |
|           | *****                                                          |     |
| Gibbon    | tcgggagggctgaggcaggagaatggcctgaacccaggaggcgagcttgcaagtgagccga  | 240 |
| Orangutan | ttgggagggctgaggcaggcgaatggcctgaacccaggaggtggagcttgcaagtgagcaga | 240 |
| Bonobo    | tcaggagggctgaggcaggagaatgacctgaacccaggaggcgagcttgcaagtgagcaga  | 240 |
| Human     | tcgggagggctgaggcaggagaatgacctgaacccaggaggcgagcttgcaagtgagcaga  | 240 |
|           | * *****                                                        |     |
| Gibbon    | gattgcgccactgca                                                | 300 |
| Orangutan | gattgcgccattgca                                                | 296 |
| Bonobo    | gattgcgccattgca                                                | 296 |
| Human     | gattgcgccattgca                                                | 296 |
|           | *****                                                          |     |
| Gibbon    | aaaaaaaaaatagtcaaagctcttgatttacagtttggtccacagccttggtttgatctt   | 360 |
| Orangutan | -----aaaaagtcaaagatcttgatttatagtttggtccacagccttggtttgatctt     | 350 |
| Bonobo    | aaaaataaataatcaaagctcttgatttatagtttggtccacagccttggtttgatctt    | 356 |
| Human     | aaaaataaataatcaaagctcttgatttatagtttggtccacagccttggtttgatctt    | 356 |
|           | ** * *****                                                     |     |
| Gibbon    | tcctttctcctgttttattgccatttaccacgtactgtagaacatccctttcaactgct    | 420 |
| Orangutan | tcctttctcctgttttattgccatttaccacgtactgtagaacatccctttcaactgct    | 410 |
| Bonobo    | tcctttatcctgttttattgccatttaccatgtactgtagaacatccctttcaactgct    | 416 |
| Human     | tcctttatcctgttttattgccatttaccacgtactgtagaacatccctttcaactgct    | 416 |
|           | *****                                                          |     |

|                   |                                                               |     |
|-------------------|---------------------------------------------------------------|-----|
| Gibbon            | gataacttggaacaagcctacaaaaataagtaattttctaactactactaatgctacccc  | 480 |
| Orangutan         | gataacttggaacaagcctacaaaaataagtaattttctaactattcctaatactacccc  | 470 |
| Bonobo            | gataacttggaacaagcctacaaaaataagtaattttctaactactcctaatactaccta  | 476 |
| Human             | gataacttggaacaagcctacaaaaataagtaattttctaactactcctaatactaccta  | 476 |
| ***** * *****     |                                                               |     |
| Gibbon            | taactaccctaagcccttaccacactaacgtgacattatttaaattttttattttatttaa | 540 |
| Orangutan         | taactaccctaagcccttaccacactaatgtgacattatttaaattttttattttatttaa | 530 |
| Bonobo            | taactaccctaagcccttaccactcctaagtgacattatttaaattttttattttatttaa | 536 |
| Human             | taactaccctaagcccttaccactcctaagtgacattatttaaattttttattttatttaa | 536 |
| ***** *****       |                                                               |     |
| Gibbon            | cactaatatttttaactacaattacagcatatgggcaatgcagaatttacccaaaaggata | 600 |
| Orangutan         | cactaatatttttaactacaattacagcatatgggcaatgcagaatttacctaaaaggata | 590 |
| Bonobo            | cactaatatttttaactacaattacagcatatgggcaatacagaatttacctaaaaggata | 596 |
| Human             | cactaatatttttaactacaattacagcatatgggcaatacagaatttacctaaaaggata | 596 |
| ***** *****       |                                                               |     |
| Gibbon            | ctaatttggaaactaaaaataacaccttttgcatgtatcatgtcacaccagtttgcc     | 660 |
| Orangutan         | ctaatttggaaacaaaaaatatcaccttttgcatgtatcatgtcacaccagtttgcc     | 650 |
| Bonobo            | ctaatttggaaacaaaaaaaatcaccttttgcatgtatcatgtcacaccagtttgcc     | 656 |
| Human             | ctaatttggaaacaaa-aaaaatcaccttttgcatgtatcatgtcacaccagtttgcc    | 655 |
| ***** ** * *****  |                                                               |     |
| Gibbon            | attgaaacaaatagaggttgcaaatattgtcagattgtcaggctgtaagaaaggatgaaa  | 720 |
| Orangutan         | attgaaacaaatagaggttgcaaatattgtcagattgtcaggctgtaagaaaggatgaaa  | 710 |
| Bonobo            | attgaaacaaatagaggttgcaaatattgtcagattgtcaggctgtaagaaaggatgaaa  | 716 |
| Human             | attgaaacaaatagaggttgcaaatattgtcagattgtcaggctgtaagaaaggatgaaa  | 715 |
| *****             |                                                               |     |
| Gibbon            | ttcatttcccatgtcatcatcttgtggcccatggatttcaagtgccttagccaaaatcgt  | 780 |
| Orangutan         | ttcatttcccatgtcatcatcttgtggcccatggatttcaagtaccttagccaaaatcat  | 770 |
| Bonobo            | ttcatttcccatgtcatcatcttgtggcccatggatttcaagtgccttagccaaaatcat  | 776 |
| Human             | ttcatttcccatgtcatcatcttgtggcccatggatttcaagtgccttagccaaaatcat  | 775 |
| ***** ***** *     |                                                               |     |
| Gibbon            | atagctagtttagcagtagagctgagactcagaaaaa--aaagtaaaacagacagactga  | 837 |
| Orangutan         | atagctagtttagcagtagagccgagactcagaaaaaacaaagtaaaacaggcagactga  | 830 |
| Bonobo            | atagctagtttagcagtagagccgagactcagaaaaaacaaagtaaaacaggcagactga  | 836 |
| Human             | atagctagtttagcagtagagccgagactcagaaaaaacaaagtaaaacaggcagactga  | 835 |
| ***** ***** ***** |                                                               |     |



Gibbon aacaaaaagtcttctaattcccaggtccccgtgtaaaatttgcttcatataaacaacactg 897  
Orangutan aacaaaaagtcttctaattcccaggtccacatgtaaaatttgcttcatataaacaaccta 890  
Bonobo aacaaaaagtcttctaattcccaggtccacatgtaaaatttgcttcatataaacaaccta 896  
Human aacaaaaagtcttctaattcccaggtccacatgtaaaatttgcttcatataaacaaccta 895  
\*\*\*\*\* \* \*\*\*\*\*

Gibbon attgtaaattggcactgtagcaacaggcttctttttaacagttggattggtaaaggctcttg 957  
Orangutan attgtaaattggcactgtagcaacaggcttctttttaacacttggattggtaaaggccttg 950  
Bonobo attgtaaattggcactgtagcaacaggcttctttttaacacttggattggtaaaggctcttg 956  
Human attgtaaattggcactgtagcaacaggcttctttttaacacttggattggtaaaggctcttg 955  
\*\*\*\*\* \*\*\*\*\* \*

Gibbon tttgcaacatattgcaagtattatTTTTTctctctTTTTTTTTTT--gttttcccccaacag 1015  
Orangutan tttgcaacatattagaagtattatTTTTTctctctccccccctacccccacccccacag 1010  
Bonobo tttgcaacatattagaagtattatTTTTTctctcttttcccccc----ccccacccccacag 1011  
Human tttgcaacatattagaagtattatTTTTTctctcttttcccccc---acccccacccccacag 1012  
\*\*\*\*\* \*\*\*\*\* \*

Gibbon agtctggctctgtcgccacgctggagtgcaagtgggtgcagtcttggctcactgcagcctc 1075  
Orangutan agtctggctctgtcgccaccccgagtgcaagtgggtgcagtcttggctcactgcagcctc 1070  
Bonobo agtctggctctgtcgccaccccgagtgcaagtgggtgcaatcttggctcactgcagcctc 1071  
Human agtctggctctgtcgccaccccgagtgcaagtgggtgcagtcttggctcactgcagcctc 1072  
\*\*\*\*\* \*\*\*\*\* \*

Gibbon cacttcccaggttcaagcaattctcgtgcctcagcctcctgagtagttgggattacaggt 1135  
Orangutan cacttcccaggttcaagcaattctcgtgcctcagcctcctgagtagttgggattacaggt 1130  
Bonobo cacttcccaggttcaagcaattctcgtgcctcagcctcctgagtagttgggattacaggt 1131  
Human cacttcccaggttcaagcaattctcgtgcctcagcctcctgagtagttgggattacaggt 1132  
\*\*\* \*\*\*\*\*

Gibbon gctcactactacacccggctaatttttTgtatttttagtagagatgggggtttcgtcatgtt 1195  
Orangutan gctcaccactacacccggctaatttttTgtatttttagtagagatgggggtttcgtcatgtt 1190  
Bonobo gctcaccactataacccggctaatttttTgtatttttagtagagatgggggtttcgtcatgtt 1191  
Human gctcaccactataacccggctaatttttTgtatttttagtagagatgggggtttcgtcatgtt 1192  
\*\*\*\*\*

Gibbon ggccagggttggtcttgaactcctgacctcaagtgatccaccaccttggccttccaaaat 1255  
Orangutan ggccagggttggtcttgaactcctgacctcaagtgatccaccaccttggccttccaaaat 1250  
Bonobo ggccagggttggtcttgaactcctgacctcaagtgatccaccaccttggccttccaaaat 1251  
Human ggccagggttggtcttgaactcctgacctcaagtgatccaccaccttggccttccaaaat 1252  
\*\*\*\*\*

|           |                                           |      |
|-----------|-------------------------------------------|------|
| Gibbon    | <div>gctgggattacaggcttgagccaccaggcc</div> | 1285 |
| Orangutan | <div>gctgggattacaggcttgagccaccaggcc</div> | 1280 |
| Bonobo    | <div>gctgggattacaggcttgagccaccaggcc</div> | 1281 |
| Human     | <div>gctgggattacaggcttgagccaccaggcc</div> | 1282 |
| *****     |                                           |      |

AluY

AluSz

**Figure S7.** AluY-AluSz6 sequence is highly conserved between humans and primates. *RBM8A* 3'UTR sequence containing AluY and AluSz6 elements compared between human, bonobo, orangutan and gibbon using Clustal Omega alignment tool (<https://www.ebi.ac.uk/Tools/msa/clustalo/>, accessed on 23 September 2021). AluY is highlighted in yellow, AluSz6 in green. Stars indicate identical nucleotide in all species.

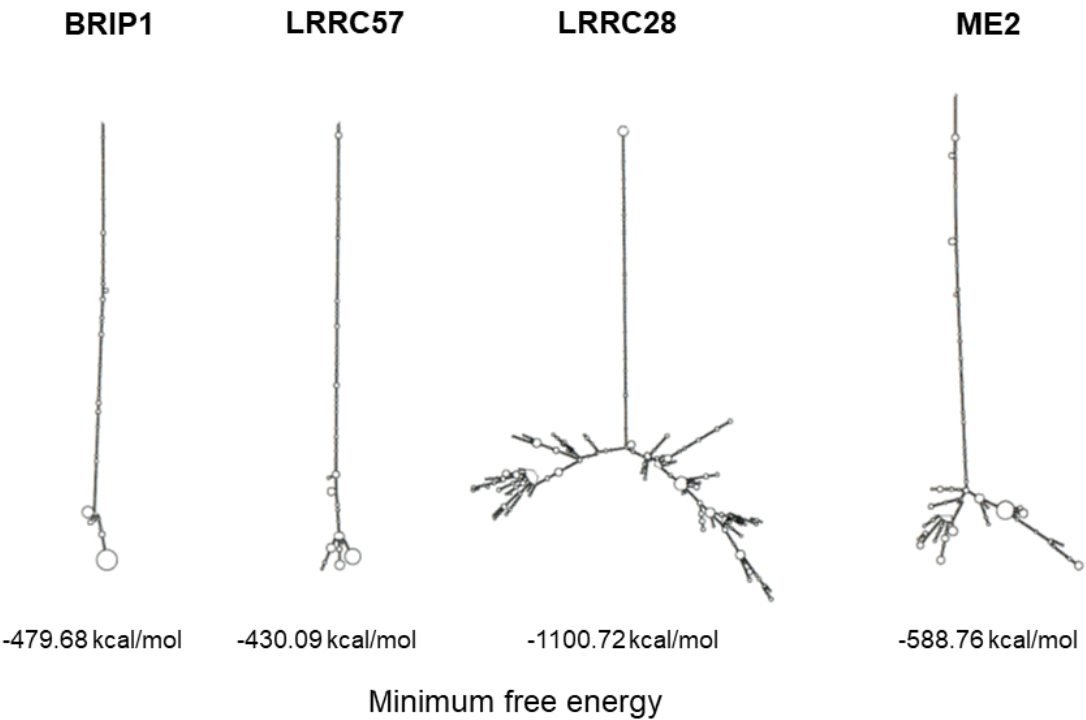

**Figure S8.** AluY-AluSz6 dsRNA structure is conserved in other transcripts enriched in the MPM translatoe. Performing BLASTN using *RBM8A* 3'UTR sequence containing AluY and AluSz6 elements retrieved transcripts known to be edited by ADARs, to interact with MSI2 and to be present in the MPM translatoe. They bear a similar dsRNA structure as *RBM8A* 3'UTR. BRIP1: BRCA1 interacting helicase 1, LRRC57: leucine rich repeat containing 57, LRRC28: leucine rich repeat containing 28, ME2: malic enzyme 2. Structures are predicted by RNAfold webserver (<http://rna.tbi.univie.ac.at/cgi-bin/RNAWebSuite/RNAfold.cgi>, accessed on 1 November 2021).
